# Supplementary material for: Spectroscopic characterization of heteronuclear iron–chromium carbonyl cluster anions
Source: Royal Society of Chemistry journal article supplement (doi:10.1039/d3cp04248k), 2023-01-01
Supplement: d3cp04248k1.pdf [file d3cp04248k1.pdf]

## Supporting Information

### Spectroscopic characterization of heteronuclear iron-chromium carbonyl cluster anions

Chaoxian Chi<sup>\*a,b</sup> Zhixiang Yang,<sup>b</sup> Bin Zeng,<sup>b</sup> Qifeng Qin,<sup>b</sup> and Luyan Meng<sup>\*b,c</sup>

<sup>a</sup> Key Laboratory of Advanced Mass Spectrometry and Molecular Analysis of Zhejiang Province, Institute of Mass Spectrometry, School of Material Science and Chemical Engineering, Ningbo University, Ningbo, Zhejiang Province 315211, China

<sup>b</sup> School of Chemistry and Materials Science, East China University of Technology, Nanchang, Jiangxi Province 330013, China

<sup>c</sup> Ningbo Institute of Life and Health Industry, University of Chinese Academy of Sciences, Ningbo, Zhejiang, 315020, China

\* Correspondence: [chichaoxian@nbu.edu.cn](mailto:chichaoxian@nbu.edu.cn) (C. Chi); [mly91055@163.com](mailto:mly91055@163.com) (L. Meng)

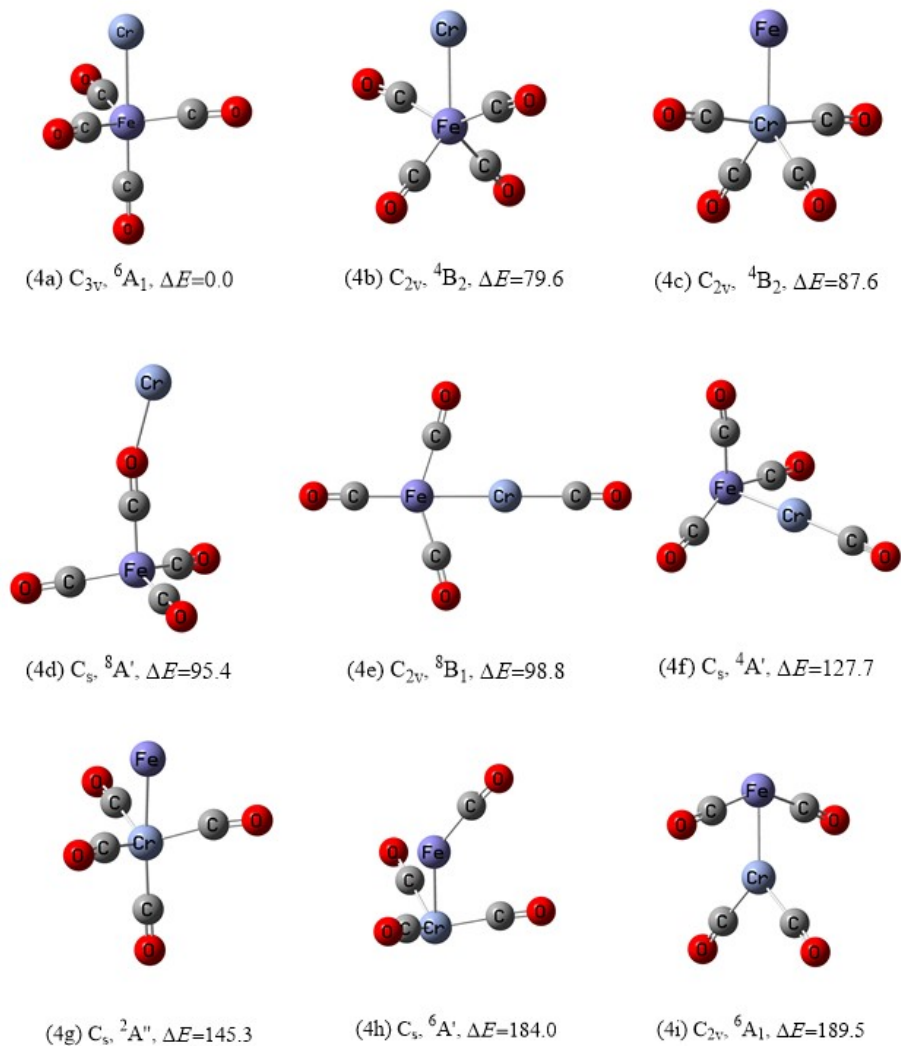

**Fig. S1** Optimized structures of the  $\text{CrFe}(\text{CO})_4^-$  isomers calculated at the B3LYP/6-311+G(d) level, including the symmetry, electronic state, and the relative energy with ZPE correction of each isomer ( $\Delta E$  in kJ/mol).

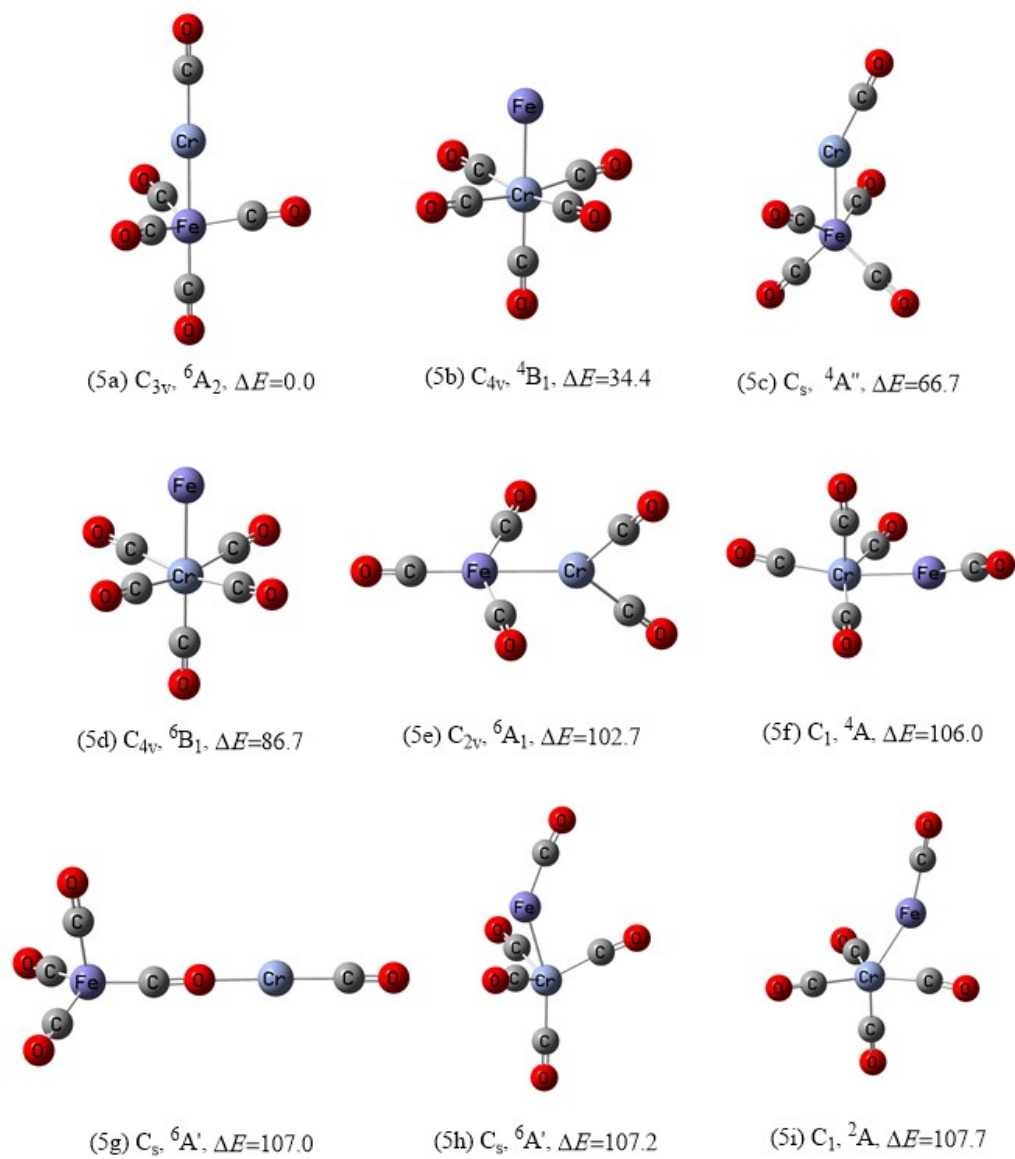

**Fig. S2** Optimized structures of the nine lowest-energy isomers of the  $\text{CrFe}(\text{CO})_5^-$  cluster anions calculated at the B3LYP/6-311+G(d) level, including the symmetry, electronic state, and the relative energy with ZPE correction of each isomer ( $\Delta E$  in kJ/mol).

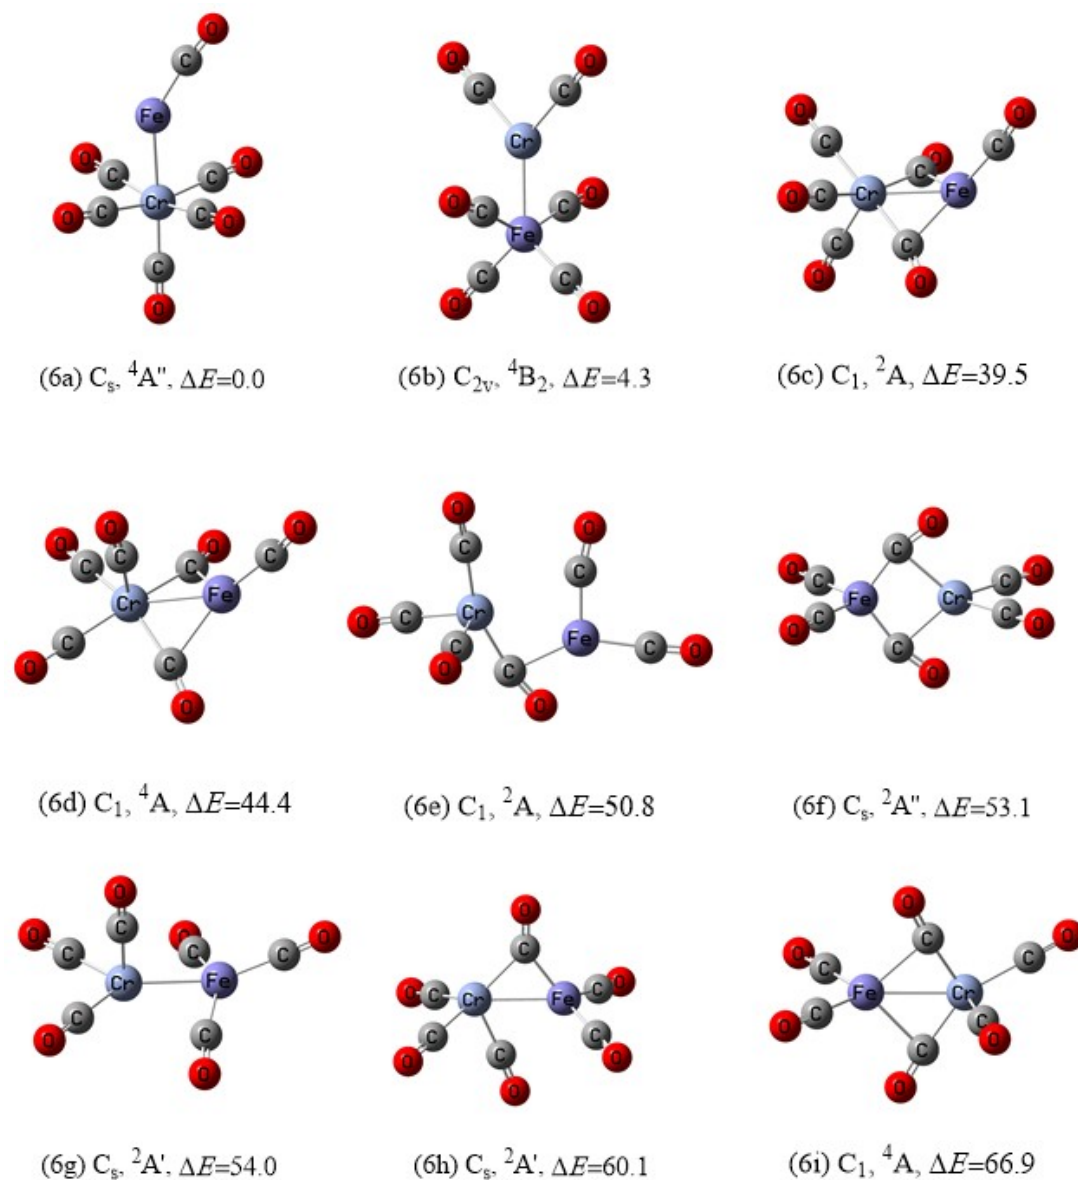

**Fig. S3** Optimized structures of the nine lowest-energy isomers of the  $\text{CrFe}(\text{CO})_6^-$  cluster anions calculated at the B3LYP/6-311+G(d) level, including the symmetry, electronic state, and the relative energy with ZPE correction of each isomer ( $\Delta E$  in kJ/mol).

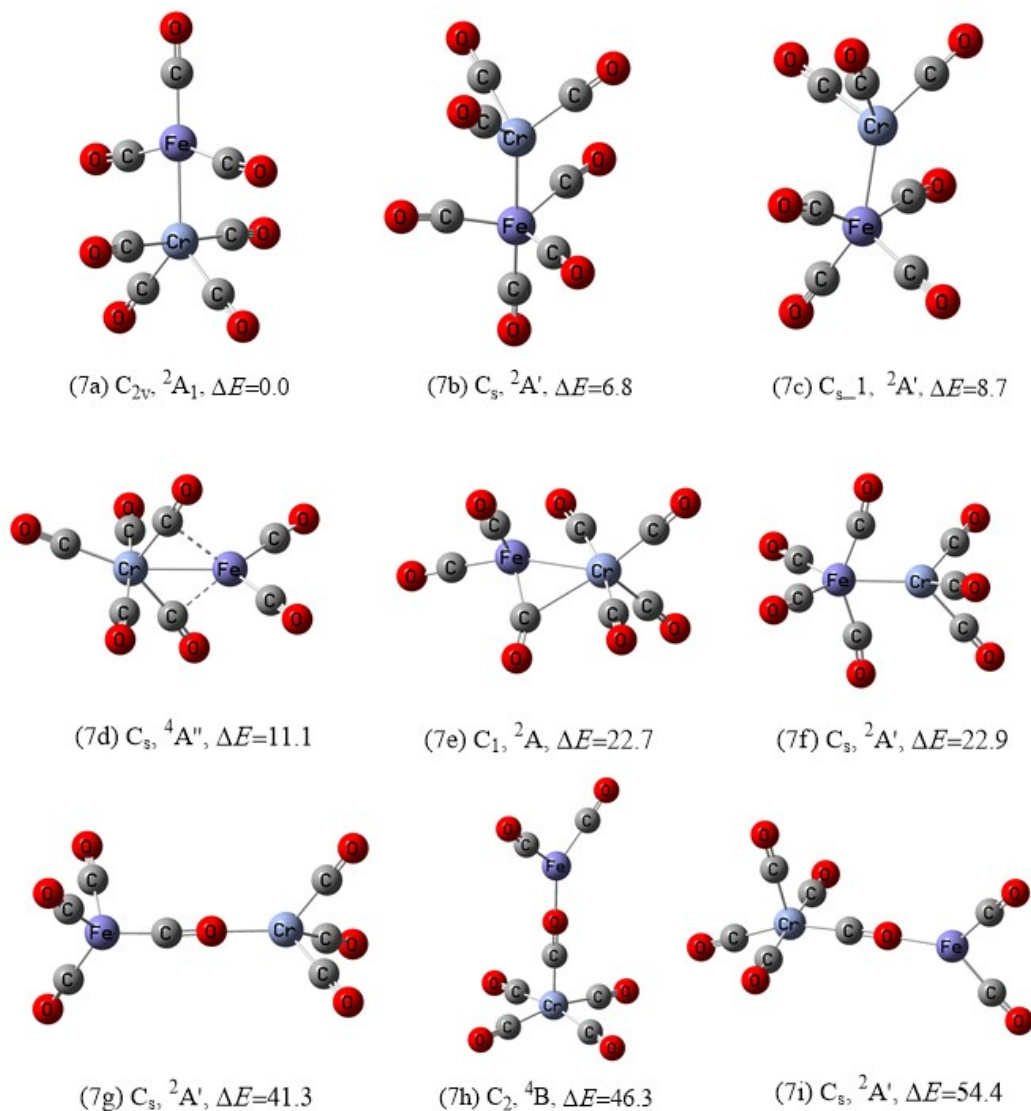

**Fig. S4** Optimized structures of the nine lowest-energy isomers of the  $\text{CrFe}(\text{CO})_7^-$  cluster anions calculated at the B3LYP/6-311+G(d) level, including the symmetry, electronic state, and the relative energy with ZPE correction of each isomer ( $\Delta E$  in kJ/mol).

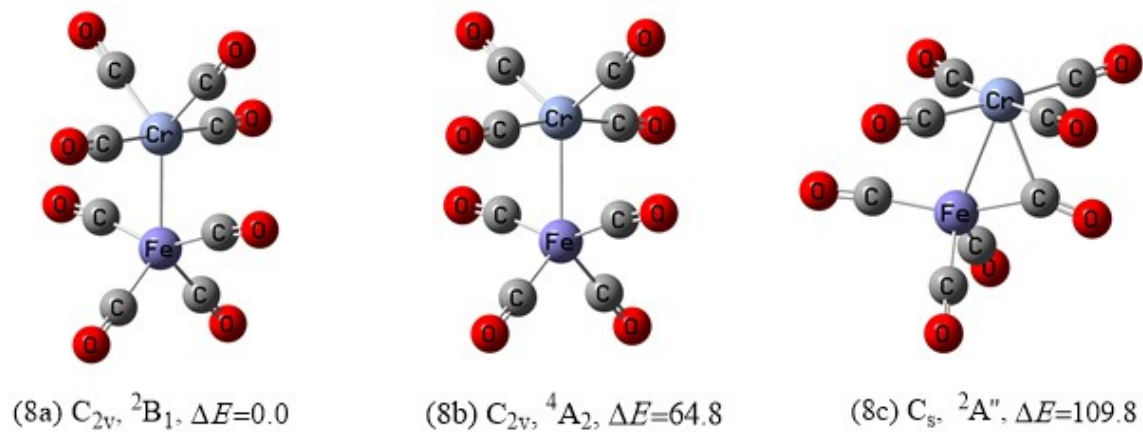

**Fig. S5** Optimized structures of the  $\text{CrFe}(\text{CO})_8^-$  isomers calculated at the B3LYP/6-311+G(d) level, including the symmetry, electronic state, and the relative energy with ZPE correction of each isomer ( $\Delta E$  in kJ/mol).

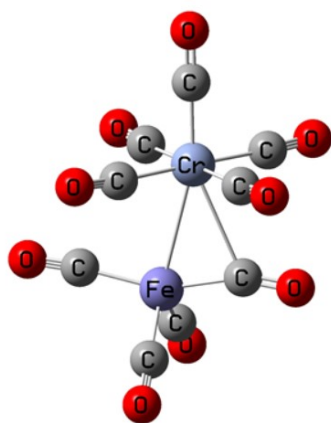

(9a)  $C_s$ ,  $^2A''$ ,  $\Delta E=0.0$

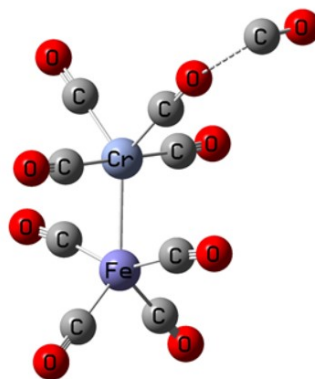

(9b)  $C_1$   $^2A$ ,  $\Delta E=85.9$

**Fig. S6** Optimized structures of the  $\text{CrFe}(\text{CO})_9^-$  isomers calculated at the B3LYP/6-311+G(d) level, including the symmetry, electronic state, and the relative energy with ZPE correction of each isomer ( $\Delta E$  in kJ/mol).

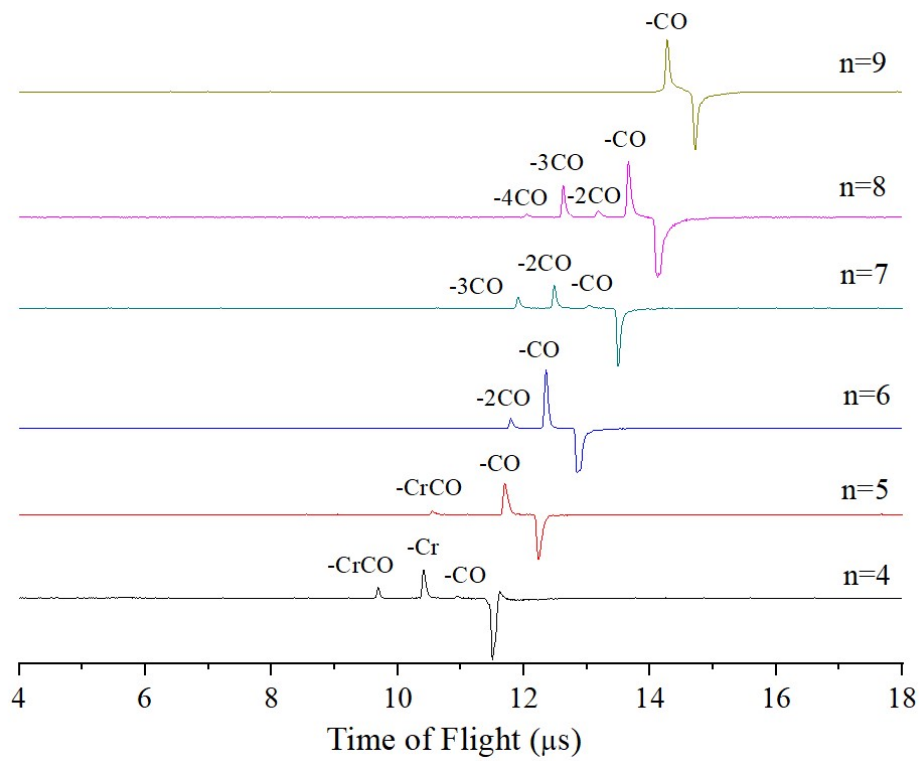

**Fig. S7** The photo-fragmentation mass spectra of the  $\text{CrFe}(\text{CO})_n^-$  ( $n=4-9$ ) cluster anions (difference in mass spectra for a selected anion recorded with and without the photodissociation laser). The negative peak demonstrates the depletion of the mass-selected anion, whereas the positive peaks show the produced fragment anions.



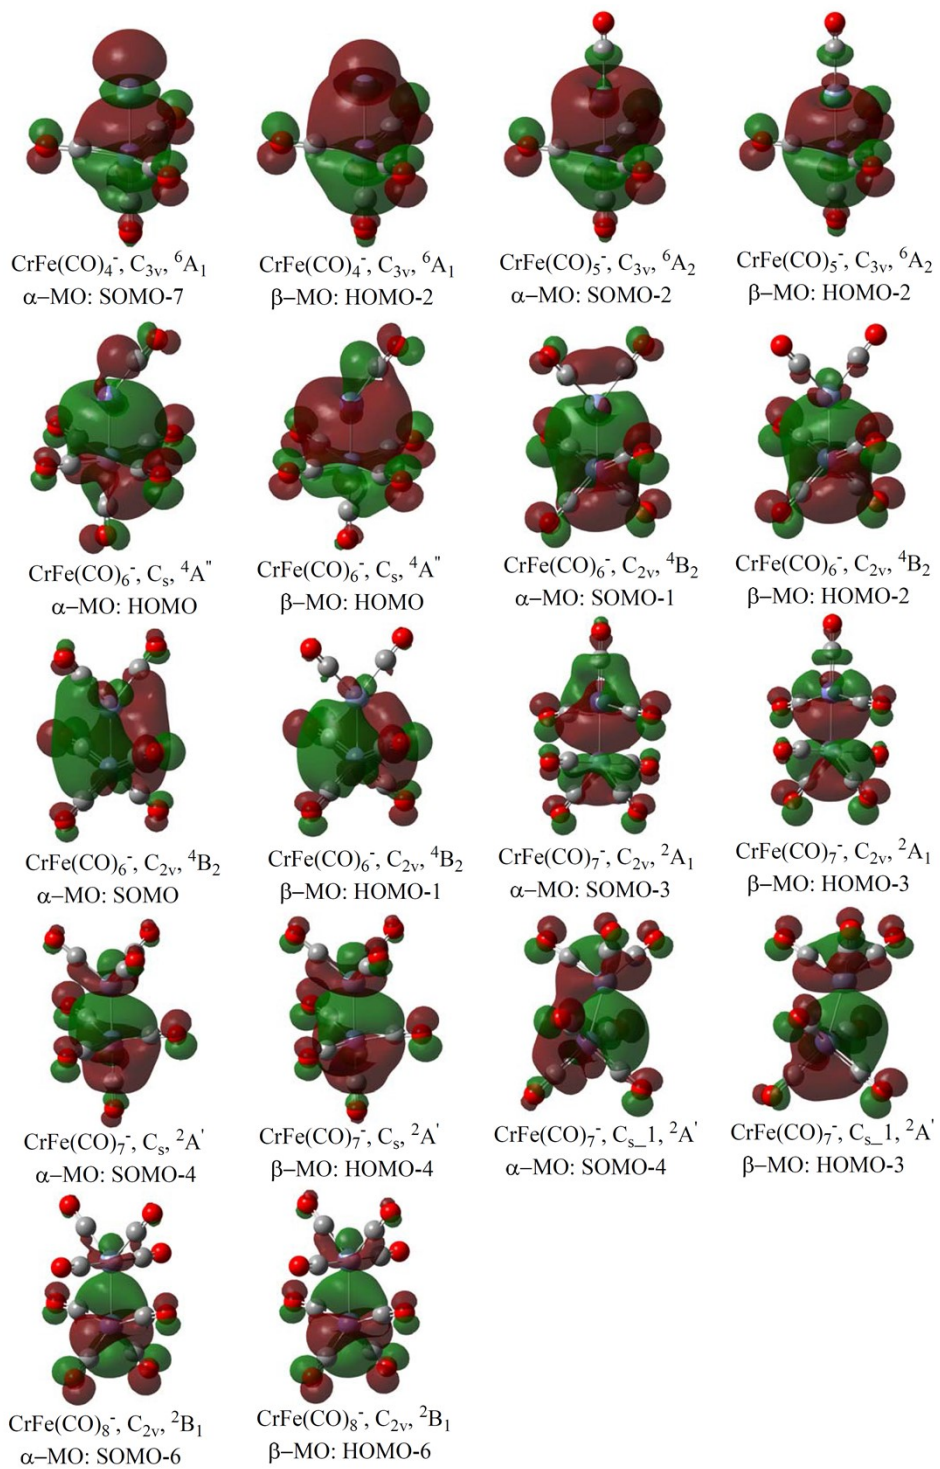

**Fig. S8** The frontier bonding orbitals accounting for the Cr-Fe binding of the observed  $\text{CrFe}(\text{CO})_n^-$  ( $n = 4-8$ ) cluster anions.

**Table S1.** Bonding characters of the most stable isomer (9a) for the  $\text{CrFe}(\text{CO})_9^-$  anion calculated at the

| Structures                        | Cr-Fe |      | NBO Group Charge    |                     | Natural Charge |       | NBO net spin <sup>a</sup> /e |      |
|-----------------------------------|-------|------|---------------------|---------------------|----------------|-------|------------------------------|------|
|                                   | R (Å) | WBI  | Fe(CO) <sub>4</sub> | Cr(CO) <sub>5</sub> | Fe             | Cr    | Fe                           | Cr   |
| $\text{CrFe}(\text{CO})_9^-$ (9a) | 2.914 | 0.28 | -0.34               | -0.66               | -1.41          | -2.49 | 1.01                         | 0.01 |

B3LYP/6-311+G(d) Levels .

<sup>a</sup> Net spin population on the Fe and Cr atoms.
